# Supplementary material for: Prussian blue nanospheres synthesized in deep eutectic solvents
Source: Royal Society of Chemistry journal article supplement (doi:10.1039/c2nr31830j), 2012-01-01
Supplement: c2nr31830j.pdf [file c2nr31830j.pdf]

## **Supporting Information**

### **Prussian Blue Nanospheres Synthesized in Deep Eutectic Solvents**

Qing-Lin Sheng and Jian-Bin Zheng\*

*Institute of Analytical Science, Shaanxi Provincial Key Laboratory of Electroanalytical Chemistry,  
Northwest University, Xi'an, P. R. China*

**Table 1S.** Comparison of the performance of other glucose biosensors.

| Shape    | Size (nm) | Electrode                         | Sensitivity<br>( $\mu\text{A}\cdot\text{mM}^{-1}$ ) | Linear Range<br>( $\times 10^{-3} \text{ mol}\cdot\text{L}^{-1}$ ) | Detection Limit<br>( $\times 10^{-6} \text{ mol}\cdot\text{L}^{-1}$ ) | Ref.      |
|----------|-----------|-----------------------------------|-----------------------------------------------------|--------------------------------------------------------------------|-----------------------------------------------------------------------|-----------|
| Cage     | 1         | GOD/PB-MSCF                       | 0.047                                               | 1.0 – 12.0                                                         | 20.0                                                                  | [1]       |
| Cubic    | 35        | CS-PB@MWNTs/H-Pt<br>Co/GOD/Nafion | 3.0                                                 | 0.003 – 3.6                                                        | 0.85                                                                  | [2]       |
| Cubic    | 30        | GOD-PB-SWNTs/CS                   | 0.44                                                | 0.5 – 13.5                                                         | 5                                                                     | [3]       |
| Clusters | 50 – 200  | PB/CTAB/AuNPs                     | 2                                                   | 0.02 – 0.4                                                         | 7                                                                     | [4]       |
| Flake    | 20 – 40   | PDA/PB/MWNTs                      | N/A                                                 | 0.01 – 2.5                                                         | 5                                                                     | [5]       |
| Tube     | 250       | GOD/PB nanotube array             | N/A                                                 | 0.005 – 8.0                                                        | 1.0                                                                   | [6]       |
| Particle | 10 – 20   | ODTA/PB/GOD LB                    | 0.06                                                | 1.0 – 16.0                                                         | 0.1                                                                   | [7]       |
| Sphere   | 20        | GOD/PB/MWNTs                      | N/A                                                 | 1.0 – 8.0                                                          | 12.7                                                                  | [8]       |
| Sphere   | 100       | GOD/PGNs/OSiFPB                   | 9.8                                                 | 0.006 – 1.3                                                        | 2.0                                                                   | [9]       |
| Sphere   | 10        | GOD-PB NSs/PVA                    | 61.7                                                | 0.0009 – 0.12                                                      | 0.3                                                                   | This work |

MSCF: mesocellular silica-carbon foam; MWNTs: multiwalled carbon nanotubes; PVP: poly(4-vinylpyridine); PGNs: positively charged gold nanoparticles; OSiFPB: organosilica nanosphere functionalized Prussian blue; CS: chitosan; H-PtCo: hollow PtCo (H-PtCo); SWNTs/CS: single-walled carbon nanotubes; CTAB: cetyltrimethylammonium bromide; AuNPs: Au nanoparticles; ODTA: octadecyltrimethylammonium; N/A, not available.

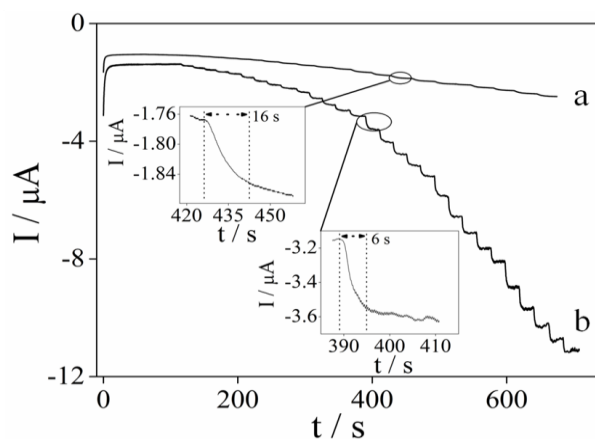

**Figure 1S.** Current-time responses of the (a) GOD-PB NSs/PVA/GCE and (b) GOD-PB MPs/PVA/GCE with successive addition of glucose into pH 7.0 0.05 M PBS (0.1 M KCl), applied potential: 0.1 V.

## References

- [1] S. Wu, Y. Y. Liu, J. Wu, H. X. Ju, *Electrochem. Commun.* **2008**, *10*, 397.
- [2] X. Che, R. Yuan, Y. Q. Chai, J. J. Li, Z. J. Song, W. J. Li, *Electrochim. Acta* **2010**, *55*, 5420.
- [3] W. Zhang, L. L. Wang, N. Zhang, G. F. Wang, B. Fang, *Electroanalysis* **2009**, *21*, 2325.
- [4] J. Du, Y. F. Wang, X. B. Zhou, Z. H. Xue, X. H. Liu, K. Sun, X. Q. Lu, *J. Phys. Chem. C* **2010**, *114*, 14786.
- [5] J. X. Zeng, W. Z. Wei, X. Y. Liu, Y. Wang, G. M. Luo, *Microchim. Acta* **2008**, *160*, 261.
- [6] Y. Z. Xian, Y. Hu, F. Liu, Y. Xian, L. J. Feng, L. T. Jin, *Biosens. Bioelectron.* **2007**, *22*, 2827.
- [7] H. Ohnuki, T. Saiki, A. Kusakari, H. Endo, M. Ichihara, M. Izumi, *Langmuir* **2007**, *23*, 4675.
- [8] L. D. Zhu, J. L. Zhai, Y. N. Guo, C. Y. Tian, R. L. Yang, *Electroanalysis* **2006**, *18*, 1842.
- [9] W. J. Li, R. Yuan, Y. Q. Chai, *Talanta* **2010**, *82*, 367.
